# Supplementary material for: Dietary Patterns and Their Associations with Intermediate Age-Related Macular Degeneration in a Japanese Population
Source: MDPI journal article supplement (doi:10.3390/jcm11061617), 2022-03-15
Supplement: s1 [file s1]

Supplemental Table S2. Frequency of food/recipe consumption per week according to each dietary pattern

|                                     | Vegetable rich |           |            |            |                                                            | Varied staple food |           |           |           |                                                            | Animal foods rich |           |           |           |                                                            | Seafood rich |           |           |            |                                                            |
|-------------------------------------|----------------|-----------|------------|------------|------------------------------------------------------------|--------------------|-----------|-----------|-----------|------------------------------------------------------------|-------------------|-----------|-----------|-----------|------------------------------------------------------------|--------------|-----------|-----------|------------|------------------------------------------------------------|
|                                     | Q1             | Q2        | Q3         | Q4         | $\beta$ coefficient<br>(95%CI) per 1<br>quartile increment | Q1                 | Q2        | Q3        | Q4        | $\beta$ coefficient<br>(95%CI) per 1<br>quartile increment | Q1                | Q2        | Q3        | Q4        | $\beta$ coefficient<br>(95%CI) per 1<br>quartile increment | Q1           | Q2        | Q3        | Q4         | $\beta$ coefficient<br>(95%CI) per 1<br>quartile increment |
| Margarine on bread                  | 0.8 (1.8)      | 0.8 (1.8) | 0.8 (1.7)  | 0.9 (1.9)  | 0.04 (-0.02, 0.09)                                         | 0.1 (0.3)          | 0.3 (0.5) | 0.6 (0.9) | 2.3 (3.0) | 0.67 (0.62, 0.72)                                          | 0.6 (1.7)         | 0.7 (1.6) | 0.8 (1.7) | 1.1 (2.1) | 0.14 (0.09, 0.19)                                          | 1.0 (2.0)    | 0.9 (1.9) | 0.8 (1.9) | 0.5 (1.4)  | -0.13 (-0.18, -0.08)                                       |
| Butter on bread                     | 0.2 (0.7)      | 0.2 (0.9) | 0.2 (0.6)  | 0.2 (1.0)  | 0.00 (-0.02, 0.03)                                         | 0.1 (0.3)          | 0.1 (0.3) | 0.2 (0.5) | 0.5 (1.5) | 0.14 (0.12, 0.16)                                          | 0.2 (0.9)         | 0.2 (0.7) | 0.2 (0.7) | 0.3 (0.9) | 0.04 (0.01, 0.06)                                          | 0.2 (1.0)    | 0.2 (0.6) | 0.2 (0.8) | 0.2 (0.8)  | -0.01 (-0.03, 0.02)                                        |
| Milk                                | 3.0 (3.6)      | 3.5 (3.8) | 4.0 (4.0)  | 4.7 (4.5)  | 0.55 (0.43, 0.67)                                          | 3.0 (3.5)          | 3.6 (3.9) | 3.9 (4.1) | 4.7 (4.4) | 0.54 (0.42, 0.66)                                          | 4.3 (4.2)         | 3.9 (4.1) | 3.6 (4.0) | 3.4 (3.8) | -0.32 (-0.44, -0.20)                                       | 4.2 (4.4)    | 3.9 (4.1) | 3.6 (3.8) | 3.5 (3.9)  | -0.24 (-0.36, -0.12)                                       |
| Yogurt                              | 1.5 (2.5)      | 2.4 (3.0) | 2.8 (3.1)  | 3.7 (4.0)  | 0.69 (0.59, 0.78)                                          | 1.2 (2.0)          | 2.2 (2.7) | 2.7 (3.1) | 4.3 (4.1) | 0.98 (0.89, 1.07)                                          | 3.9 (4.0)         | 2.5 (3.1) | 2.0 (2.5) | 1.9 (2.9) | -0.64 (-0.74, -0.55)                                       | 2.5 (3.2)    | 2.6 (3.2) | 2.4 (3.1) | 2.8 (3.6)  | 0.07 (-0.02, 0.17)                                         |
| Miso soup                           | 8.1 (6.1)      | 9.5 (6.0) | 10.6 (6.1) | 11.2 (6.1) | 1.03 (0.85, 1.21)                                          | 15.5 (5.7)         | 9.4 (5.5) | 8.2 (5.1) | 6.4 (4.2) | -2.84 (-3.00, -2.68)                                       | 10.7 (6.0)        | 9.8 (6.3) | 9.5 (6.0) | 9.4 (6.3) | -0.42 (-0.60, -0.23)                                       | 10.1 (6.3)   | 9.9 (6.2) | 9.5 (6)   | 10.0 (6.2) | -0.08 (-0.27, 0.11)                                        |
| Tofu products                       | 1.4 (1.7)      | 2.3 (2.6) | 3.1 (3.2)  | 4.5 (4.0)  | 1.01 (0.92, 1.10)                                          | 3.4 (4.1)          | 2.5 (2.7) | 2.8 (2.9) | 2.7 (2.9) | -0.19 (-0.29, -0.10)                                       | 3.9 (4.0)         | 2.4 (2.5) | 2.5 (2.7) | 2.5 (3.2) | -0.40 (-0.49, -0.30)                                       | 2.3 (2.7)    | 2.4 (2.7) | 2.7 (2.8) | 4.0 (4.1)  | 0.53 (0.44, 0.63)                                          |
| Soy / Natto<br>(fermented soybeans) | 2.4 (2.4)      | 3.3 (3.2) | 3.9 (3.1)  | 5.4 (4.0)  | 0.96 (0.86, 1.06)                                          | 4.7 (4.4)          | 3.8 (3.1) | 3.5 (2.9) | 3.0 (2.6) | -0.53 (-0.63, -0.43)                                       | 4.6 (3.8)         | 3.6 (3.2) | 3.4 (3)   | 3.5 (3.4) | -0.35 (-0.45, -0.24)                                       | 3.5 (3.3)    | 3.4 (3.1) | 3.6 (3.2) | 4.5 (3.8)  | 0.30 (0.20, 0.40)                                          |
| Eggs                                | 2.2 (2.0)      | 3.0 (2.4) | 3.4 (2.3)  | 4.2 (3.0)  | 0.62 (0.55, 0.69)                                          | 3.7 (3.2)          | 3.2 (2.4) | 3 (2.2)   | 3.0 (2.4) | -0.22 (-0.30, -0.15)                                       | 2.5 (2.0)         | 2.7 (2.1) | 3.3 (2.4) | 4.3 (3.1) | 0.61 (0.54, 0.69)                                          | 3.7 (2.7)    | 3.2 (2.5) | 2.8 (2.2) | 3.0 (2.7)  | -0.26 (-0.33, -0.18)                                       |
| Chicken                             | 0.9 (0.8)      | 1.3 (1.1) | 1.6 (1.2)  | 2.2 (2.2)  | 0.41 (0.36, 0.45)                                          | 1.5 (1.6)          | 1.5 (1.4) | 1.5 (1.5) | 1.6 (1.6) | 0.03 (-0.01, 0.08)                                         | 1.1 (1.3)         | 1.2 (1.1) | 1.5 (1.2) | 2.2 (2.0) | 0.36 (0.31, 0.40)                                          | 1.9 (1.9)    | 1.5 (1.2) | 1.3 (1.1) | 1.3 (1.5)  | -0.20 (-0.25, -0.16)                                       |
| Beef / pork                         | 1.6 (1.2)      | 2.2 (1.5) | 2.8 (1.7)  | 3.1 (2.4)  | 0.49 (0.44, 0.54)                                          | 2.6 (2.2)          | 2.4 (1.7) | 2.3 (1.6) | 2.3 (1.7) | -0.10 (-0.15, -0.05)                                       | 1.7 (1.4)         | 2.0 (1.5) | 2.5 (1.5) | 3.5 (2.3) | 0.57 (0.52, 0.62)                                          | 3.4 (2.3)    | 2.4 (1.4) | 2.0 (1.4) | 1.8 (1.6)  | -0.52 (-0.57, -0.47)                                       |
| Liver                               | 0.2 (0.4)      | 0.2 (0.4) | 0.3 (0.9)  | 0.3 (0.6)  | 0.04 (0.02, 0.06)                                          | 0.3 (0.9)          | 0.2 (0.4) | 0.2 (0.5) | 0.2 (0.4) | -0.02 (-0.04, 0.00)                                        | 0.1 (0.3)         | 0.2 (0.3) | 0.2 (0.4) | 0.4 (1.0) | 0.09 (0.07, 0.11)                                          | 0.2 (0.3)    | 0.2 (0.4) | 0.2 (0.5) | 0.3 (1.0)  | 0.06 (0.04, 0.07)                                          |
| Processed meat                      | 1.0 (1.0)      | 1.5 (1.5) | 1.9 (1.7)  | 2.5 (2.6)  | 0.49 (0.44, 0.55)                                          | 1.7 (1.8)          | 1.6 (1.5) | 1.6 (1.7) | 2.0 (2.3) | 0.12 (0.06, 0.17)                                          | 1.0 (1.4)         | 1.3 (1.3) | 1.8 (1.6) | 2.8 (2.4) | 0.58 (0.53, 0.64)                                          | 2.5 (2.4)    | 1.7 (1.7) | 1.4 (1.4) | 1.4 (1.7)  | -0.35 (-0.4, -0.29)                                        |
| Fish                                | 3.0 (2.3)      | 4.0 (2.5) | 4.8 (2.7)  | 6.5 (4.1)  | 1.13 (1.04, 1.22)                                          | 5.5 (4.0)          | 4.4 (2.9) | 4.3 (2.8) | 4.1 (2.9) | -0.45 (-0.55, -0.36)                                       | 5.6 (3.9)         | 4.1 (2.7) | 4.0 (2.8) | 4.5 (3.2) | -0.34 (-0.43, -0.24)                                       | 4.4 (3.0)    | 4.0 (2.7) | 4.2 (2.6) | 5.7 (4.1)  | 0.40 (0.30, 0.50)                                          |
| Bone-edible small fish              | 0.7 (0.9)      | 1.2 (1.5) | 1.6 (1.9)  | 3.1 (3.3)  | 0.77 (0.71, 0.83)                                          | 2.0 (2.9)          | 1.5 (1.7) | 1.6 (2.2) | 1.5 (2.0) | -0.13 (-0.2, -0.07)                                        | 2.3 (3.1)         | 1.4 (1.7) | 1.4 (1.9) | 1.5 (2.1) | -0.24 (-0.31, -0.17)                                       | 1.1 (1.6)    | 1.2 (1.5) | 1.5 (1.8) | 2.7 (3.3)  | 0.52 (0.45, 0.58)                                          |
| Canned tuna                         | 0.3 (0.4)      | 0.4 (0.5) | 0.5 (0.7)  | 0.8 (1.3)  | 0.17 (0.15, 0.20)                                          | 0.5 (1.0)          | 0.5 (0.7) | 0.5 (0.7) | 0.6 (0.9) | 0.02 (0.00, 0.05)                                          | 0.3 (0.6)         | 0.4 (0.6) | 0.5 (0.7) | 0.8 (1.2) | 0.15 (0.13, 0.17)                                          | 0.5 (0.7)    | 0.4 (0.6) | 0.5 (0.7) | 0.6 (1.2)  | 0.03 (0.01, 0.06)                                          |
| Squid / octopus /<br>shrimp / crab  | 0.7 (0.6)      | 1.0 (0.8) | 1.2 (1.2)  | 1.8 (1.9)  | 0.38 (0.34, 0.41)                                          | 1.3 (1.4)          | 1.1 (1.1) | 1.2 (1.3) | 1.2 (1.4) | -0.04 (-0.07, 0.00)                                        | 0.8 (0.9)         | 1.0 (0.9) | 1.1 (1.1) | 1.8 (1.9) | 0.32 (0.28, 0.35)                                          | 0.9 (0.9)    | 0.9 (0.8) | 1.1 (1.0) | 1.8 (2.0)  | 0.27 (0.23, 0.31)                                          |
| Shellfish                           | 0.5 (0.5)      | 0.7 (0.7) | 0.9 (1.0)  | 1.5 (1.8)  | 0.31 (0.27, 0.34)                                          | 1.0 (1.2)          | 0.8 (1.0) | 0.9 (1.2) | 0.9 (1.3) | -0.02 (-0.05, 0.02)                                        | 0.8 (0.9)         | 0.7 (0.8) | 0.9 (1.1) | 1.2 (1.7) | 0.16 (0.12, 0.19)                                          | 0.6 (0.5)    | 0.6 (0.6) | 0.8 (0.8) | 1.6 (1.9)  | 0.32 (0.28, 0.35)                                          |
| Fish eggs                           | 0.5 (0.6)      | 0.7 (0.9) | 0.9 (1.3)  | 1.1 (1.6)  | 0.21 (0.17, 0.24)                                          | 1.1 (1.6)          | 0.7 (1.0) | 0.8 (1.2) | 0.6 (0.8) | -0.15 (-0.18, -0.11)                                       | 0.4 (0.6)         | 0.6 (0.6) | 0.8 (0.9) | 1.5 (1.9) | 0.34 (0.30, 0.37)                                          | 0.6 (0.8)    | 0.7 (0.8) | 0.8 (1)   | 1.2 (1.8)  | 0.18 (0.14, 0.21)                                          |
| Fish paste products                 | 0.7 (0.7)      | 1.1 (0.9) | 1.5 (1.2)  | 2.5 (2.4)  | 0.58 (0.53, 0.62)                                          | 1.7 (2.1)          | 1.4 (1.3) | 1.4 (1.5) | 1.3 (1.4) | -0.13 (-0.18, -0.08)                                       | 1.2 (1.5)         | 1.1 (1.1) | 1.4 (1.5) | 2.0 (2.1) | 0.26 (0.21, 0.31)                                          | 1.7 (2.0)    | 1.3 (1.2) | 1.2 (1.2) | 1.5 (1.8)  | -0.06 (-0.11, -0.01)                                       |
| Tofu products                       | 1.2 (1.1)      | 2 (1.5)   | 2.8 (1.8)  | 4.2 (2.9)  | 0.97 (0.91, 1.03)                                          | 3.1 (2.8)          | 2.5 (1.9) | 2.3 (2)   | 2.2 (1.9) | -0.31 (-0.37, -0.24)                                       | 2.9 (2.7)         | 2.2 (1.9) | 2.3 (1.9) | 2.7 (2.3) | -0.04 (-0.11, 0.02)                                        | 3.0 (2.5)    | 2.4 (2.0) | 2.2 (1.9) | 2.5 (2.4)  | -0.18 (-0.25, -0.12)                                       |
| Potatoes                            | 1.1 (0.9)      | 1.8 (1.3) | 2.7 (1.6)  | 4.3 (2.8)  | 1.06 (1.01, 1.11)                                          | 2.7 (2.5)          | 2.4 (1.9) | 2.4 (2)   | 2.4 (2.2) | -0.08 (-0.14, -0.01)                                       | 2.9 (2.7)         | 2.2 (1.8) | 2.3 (1.8) | 2.5 (2.1) | -0.09 (-0.16, -0.03)                                       | 2.8 (2.3)    | 2.2 (1.9) | 2.2 (1.7) | 2.7 (2.6)  | -0.03 (-0.09, 0.04)                                        |
| Pumpkin                             | 0.5 (0.6)      | 0.9 (0.8) | 1.3 (1.1)  | 2.5 (2.5)  | 0.64 (0.59, 0.68)                                          | 1.2 (1.7)          | 1.2 (1.2) | 1.4 (1.7) | 1.5 (1.9) | 0.09 (0.04, 0.14)                                          | 1.7 (2.2)         | 1.2 (1.3) | 1.1 (1.2) | 1.3 (1.6) | -0.13 (-0.18, -0.08)                                       | 1.3 (1.7)    | 1.2 (1.6) | 1.2 (1.3) | 1.6 (1.9)  | 0.11 (0.06, 0.16)                                          |
| Carrot                              | 1.2 (1.0)      | 2.4 (1.6) | 3.4 (1.9)  | 5.3 (3.2)  | 1.31 (1.25, 1.37)                                          | 3.0 (2.6)          | 3.0 (2.3) | 3.1 (2.7) | 3.2 (2.6) | 0.10 (0.02, 0.18)                                          | 4.0 (3.0)         | 2.8 (2.3) | 2.6 (2.2) | 2.9 (2.4) | -0.34 (-0.42, -0.27)                                       | 4.0 (3.0)    | 2.9 (2.2) | 2.6 (2.1) | 2.8 (2.5)  | -0.41 (-0.48, -0.33)                                       |
| Broccoli                            | 0.7 (0.7)      | 1.3 (1.1) | 1.9 (1.5)  | 3.1 (2.9)  | 0.76 (0.71, 0.82)                                          | 1.6 (1.6)          | 1.6 (1.7) | 1.8 (2.3) | 2.0 (2.2) | 0.14 (0.09, 0.20)                                          | 2.3 (2.5)         | 1.5 (1.4) | 1.5 (1.8) | 1.8 (1.9) | -0.15 (-0.20, -0.09)                                       | 1.7 (2.0)    | 1.6 (1.7) | 1.6 (1.7) | 2.0 (2.3)  | 0.09 (0.03, 0.14)                                          |
| Green leafy vegetables              | 1.8 (1.4)      | 3.5 (2.4) | 5.1 (3.2)  | 7.7 (4.8)  | 1.95 (1.85, 2.04)                                          | 4.8 (4.2)          | 4.3 (3.7) | 4.6 (4.1) | 4.3 (3.5) | -0.13 (-0.24, -0.01)                                       | 6.8 (5.1)         | 4.0 (2.9) | 3.7 (3.1) | 3.6 (3.0) | -1.00 (-1.11, -0.89)                                       | 5.7 (4.5)    | 4.4 (3.8) | 3.8 (3.1) | 4.2 (3.8)  | -0.51 (-0.63, -0.4)                                        |
| Other green-yellow vegetables       | 1.3 (1.0)      | 2.4 (1.7) | 3.6 (2.4)  | 5.6 (4.2)  | 1.41 (1.33, 1.49)                                          | 3.1 (3)            | 3.1 (2.8) | 3.3 (3.3) | 3.4 (3.1) | 0.11 (0.02, 0.21)                                          | 4.7 (4.2)         | 2.8 (2.4) | 2.6 (2.1) | 2.8 (2.6) | -0.58 (-0.67, -0.49)                                       | 4.5 (4.0)    | 2.8 (2.4) | 2.6 (2.3) | 2.8 (2.8)  | -0.54 (-0.63, -0.45)                                       |
| Cabbage                             | 1.6 (1.1)      | 2.5 (1.5) | 3.8 (2.0)  | 5.6 (3.6)  | 1.32 (1.26, 1.39)                                          | 3.3 (2.6)          | 3.1 (2.2) | 3.5 (3.1) | 3.6 (2.8) | 0.13 (0.05, 0.21)                                          | 4.6 (3.8)         | 3 (2.1)   | 2.9 (2.0) | 3.1 (2.2) | -0.45 (-0.53, -0.37)                                       | 4.5 (3.4)    | 3.1 (2.2) | 2.9 (2.1) | 3.1 (2.6)  | -0.45 (-0.53, -0.37)                                       |
| Japanese radish                     | 1.4 (1.1)      | 2.2 (1.6) | 3.3 (1.9)  | 5.2 (3.4)  | 1.25 (1.18, 1.31)                                          | 3.3 (2.6)          | 2.9 (2.3) | 3 (2.8)   | 2.9 (2.7) | -0.11 (-0.19, -0.04)                                       | 4.0 (3.2)         | 2.7 (2.2) | 2.6 (2.1) | 2.8 (2.4) | -0.35 (-0.42, -0.27)                                       | 3.4 (2.8)    | 2.7 (2.2) | 2.7 (2.2) | 3.3 (3.0)  | -0.05 (-0.13, 0.02)                                        |
| Dried radish                        | 0.4 (0.5)      | 0.5 (0.6) | 0.7 (0.8)  | 1.4 (2.1)  | 0.33 (0.29, 0.36)                                          | 0.7 (1.2)          | 0.7 (1)   | 0.8 (1.6) | 0.8 (1.1) | 0.03 (-0.01, 0.07)                                         | 0.9 (1.5)         | 0.7 (1.2) | 0.7 (1.1) | 0.8 (1.2) | -0.03 (-0.07, 0.01)                                        | 0.6 (0.8)    | 0.6 (0.7) | 0.7 (1.0) | 1.2 (2.0)  | 0.20 (0.16, 0.24)                                          |
| Burdock root /<br>bamboo shoot      | 0.6 (0.5)      | 0.9 (0.8) | 1.2 (1.0)  | 2.0 (2.0)  | 0.45 (0.41, 0.48)                                          | 1.2 (1.3)          | 1.1 (1.1) | 1.2 (1.3) | 1.2 (1.6) | 0.01 (-0.03, 0.05)                                         | 1.3 (1.5)         | 1.1 (1.3) | 1.0 (1.0) | 1.2 (1.4) | -0.04 (-0.08, 0.00)                                        | 1.1 (1.4)    | 1.0 (1.1) | 1.1 (1.1) | 1.4 (1.6)  | 0.11 (0.07, 0.15)                                          |
| Other vegetables                    | 1.9 (1.4)      | 3.5 (2.1) | 4.9 (2.6)  | 7.2 (4.3)  | 1.73 (1.65, 1.82)                                          | 4.3 (3.3)          | 4.1 (3.1) | 4.5 (3.6) | 4.7 (3.6) | 0.16 (0.06, 0.26)                                          | 5.7 (4.3)         | 4.0 (2.9) | 3.8 (2.8) | 4.1 (3.0) | -0.50 (-0.60, -0.40)                                       | 6.3 (4.3)    | 4.1 (2.7) | 3.6 (2.6) | 3.6 (2.9)  | -0.89 (-0.98, -0.79)                                       |
| Mushrooms                           | 1.4 (1.2)      | 2.5 (1.7) | 3.9 (2.0)  | 5.9 (3.6)  | 1.48 (1.41, 1.55)                                          | 3.2 (2.7)          | 3.2 (2.4) | 3.6 (3.1) | 3.7 (3.2) | 0.17 (0.09, 0.26)                                          | 4.6 (3.4)         | 2.9 (2.5) | 2.9 (2.4) | 3.2 (2.7) | -0.41 (-0.49, -0.33)                                       | 4.7 (3.5)    | 3.2 (2.4) | 2.8 (2.3) | 3.0 (2.6)  | -0.57 (-0.65, -0.48)                                       |
| Seaweed                             | 1.2 (1.2)      | 2.2 (1.9) | 3.1 (2.1)  | 5.3 (3.4)  | 1.30 (1.23, 1.37)                                          | 3.2 (2.8)          | 2.9 (2.6) | 2.8 (2.7) | 2.9 (2.8) | -0.10 (-0.19, -0.02)                                       | 4.0 (3.3)         | 2.6 (2.4) | 2.5 (2.2) | 2.6 (2.5) | -0.42 (-0.5, -0.34)                                        | 3.5 (3.0)    | 2.7 (2.5) | 2.6 (2.4) | 3.0 (2.9)  | -0.14 (-0.22, -0.06)                                       |
| Mayonnaise                          | 1.2 (1.2)      | 1.7 (1.4) | 2.3 (1.8)  | 2.9 (2.8)  | 0.57 (0.52, 0.63)                                          | 2.1 (2.2)          | 2 (1.7)   | 1.9 (2.1) | 2 (2)     | -0.04 (-0.10, 0.02)                                        | 1.3 (1.6)         | 1.7 (1.8) | 2.1 (1.7) | 3.0 (2.4) | 0.54 (0.48, 0.59)                                          | 2.9 (2.6)    | 2.0 (1.7) | 1.7 (1.5) | 1.4 (1.7)  | -0.48 (-0.54, -0.42)                                       |
| Deep-fried food                     | 1.4 (1.1)      | 1.8 (1.2) | 2.2 (1.5)  | 2.7 (2.3)  | 0.42 (0.37, 0.47)                                          | 2.4 (2)            | 2 (1.5)   | 1.9 (1.6) | 1.8 (1.6) | -0.19 (-0.24, -0.14)                                       | 1.3 (1.4)         | 1.7 (1.2) | 2.1 (1.3) | 3.1 (2.1) | 0.59 (0.54, 0.63)                                          | 2.7 (2)      | 2.0 (1.5) | 1.8 (1.4) | 1.6 (1.6)  | -0.35 (-0.40, -0.30)                                       |

Supplemental Table S2. Frequency of food/recipe consumption per week according to each dietary pattern (Continued)

|                        | Vegetable rich |            |            |            |                                                            | Varied staple food |            |            |            |                                                               | Animal foods rich |            |            |            |                                                            | Seafood rich |            |            |            |                                                            |
|------------------------|----------------|------------|------------|------------|------------------------------------------------------------|--------------------|------------|------------|------------|---------------------------------------------------------------|-------------------|------------|------------|------------|------------------------------------------------------------|--------------|------------|------------|------------|------------------------------------------------------------|
|                        | Q1             | Q2         | Q3         | Q4         | $\beta$ coefficient<br>(95%CI) per 1<br>quartile increment | Q1                 | Q2         | Q3         | Q4         | $\beta$ coefficient<br>(95%CI) per 1<br>quartile<br>increment | Q1                | Q2         | Q3         | Q4         | $\beta$ coefficient<br>(95%CI) per 1<br>quartile increment | Q1           | Q2         | Q3         | Q4         | $\beta$ coefficient<br>(95%CI) per 1<br>quartile increment |
| Pan-fried food         | 1.8 (1.3)      | 2.8 (1.6)  | 3.7 (2.1)  | 5.1 (3.3)  | 1.06 (0.99, 1.12)                                          | 3.5 (2.7)          | 3.3 (2.3)  | 3.3 (2.6)  | 3.2 (2.5)  | -0.10 (-0.17, -0.02)                                          | 3.2 (2.7)         | 2.9 (2.3)  | 3.2 (2.1)  | 4.2 (2.7)  | 0.34 (0.26, 0.41)                                          | 5.0 (3.2)    | 3.2 (2.0)  | 2.7 (1.8)  | 2.4 (2.0)  | -0.83 (-0.90, -0.76)                                       |
| Citrus fruits          | 1.0 (1.4)      | 1.7 (1.8)  | 2.4 (2.4)  | 3.9 (3.3)  | 0.93 (0.86, 1.00)                                          | 1.6 (1.8)          | 2 (2.1)    | 2.6 (2.8)  | 2.8 (3.2)  | 0.43 (0.36, 0.51)                                             | 3.1 (3.3)         | 2.1 (2.5)  | 1.8 (1.8)  | 1.9 (2.3)  | -0.40 (-0.48, -0.32)                                       | 2.1 (2.5)    | 1.9 (2.1)  | 2.2 (2.4)  | 2.8 (3.2)  | 0.26 (0.18, 0.34)                                          |
| Other fruits           | 1.1 (1.4)      | 2.1 (2.1)  | 3.0 (2.4)  | 4.8 (3.5)  | 1.19 (1.11, 1.26)                                          | 2.1 (2.3)          | 2.4 (2.4)  | 3.0 (2.9)  | 3.5 (3.3)  | 0.46 (0.37, 0.54)                                             | 4.1 (3.5)         | 2.5 (2.5)  | 2.2 (2.2)  | 2.2 (2.4)  | -0.61 (-0.69, -0.53)                                       | 3.0 (3.2)    | 2.5 (2.5)  | 2.6 (2.6)  | 3.0 (3.0)  | 0.01 (-0.08, 0.09)                                         |
| Peanuts/almonds        | 0.4 (0.8)      | 0.8 (1.4)  | 0.8 (1.3)  | 1.5 (2.2)  | 0.32 (0.28, 0.37)                                          | 0.6 (1)            | 0.7 (1.2)  | 1.0 (1.7)  | 1.2 (2)    | 0.19 (0.14, 0.24)                                             | 0.9 (1.7)         | 0.7 (1.5)  | 0.8 (1.3)  | 1.1 (1.7)  | 0.07 (0.02, 0.12)                                          | 0.7 (1.4)    | 0.7 (1.1)  | 0.9 (1.4)  | 1.2 (2.1)  | 0.17 (0.12, 0.21)                                          |
| Western confectionery  | 0.5 (0.6)      | 0.7 (0.9)  | 0.8 (0.9)  | 1.1 (1.5)  | 0.19 (0.16, 0.22)                                          | 0.6 (0.8)          | 0.7 (0.8)  | 0.8 (0.9)  | 1.0 (1.5)  | 0.13 (0.10, 0.16)                                             | 0.5 (0.6)         | 0.6 (0.6)  | 0.8 (1.1)  | 1.2 (1.5)  | 0.24 (0.21, 0.27)                                          | 0.9 (1.2)    | 0.7 (0.9)  | 0.7 (0.9)  | 0.7 (1.2)  | -0.07 (-0.10, -0.04)                                       |
| Japanese confectionery | 0.6 (0.8)      | 1.0 (1.1)  | 1.3 (1.4)  | 2.1 (2.3)  | 0.48 (0.44, 0.53)                                          | 1.0 (1.3)          | 1.2 (1.4)  | 1.3 (1.5)  | 1.6 (2.1)  | 0.18 (0.13, 0.22)                                             | 1.3 (1.7)         | 1.0 (1.3)  | 1.2 (1.7)  | 1.5 (1.8)  | 0.08 (0.03, 0.12)                                          | 1.4 (1.8)    | 1.2 (1.5)  | 1.2 (1.5)  | 1.2 (1.7)  | -0.06 (-0.10, -0.01)                                       |
| Green tea              | 5.9 (6.5)      | 7.7 (7.3)  | 9.3 (7.6)  | 11.7 (7.8) | 1.90 (1.69, 2.12)                                          | 8.7 (7.7)          | 8.5 (7.6)  | 8.8 (7.6)  | 8.7 (7.5)  | 0.03 (-0.20, 0.26)                                            | 11.5 (8.0)        | 9.0 (7.7)  | 7.4 (7.1)  | 6.8 (6.8)  | -1.57 (-1.8, -1.35)                                        | 8.1 (7.5)    | 8.3 (7.5)  | 8.6 (7.5)  | 9.7 (7.9)  | 0.51 (0.29, 0.74)                                          |
| Coffee                 | 7.7 (6.8)      | 8.8 (6.9)  | 9.5 (7.0)  | 9.8 (7.2)  | 0.70 (0.49, 0.91)                                          | 7.8 (6.9)          | 8.5 (6.8)  | 8.9 (6.9)  | 10.5 (7.1) | 0.82 (0.62, 1.03)                                             | 7.4 (6.7)         | 8.1 (6.8)  | 9.5 (7.0)  | 10.7 (7.2) | 1.12 (0.91, 1.32)                                          | 12.8 (7.0)   | 9.9 (6.9)  | 7.4 (6.2)  | 5.6 (5.9)  | -2.41 (-2.61, -2.22)                                       |
| Rice                   | 15.0 (5.0)     | 15.8 (4.9) | 16.2 (4.4) | 16.1 (4.5) | 0.36 (0.22, 0.50)                                          | 20.0 (1.8)         | 18.1 (2.8) | 14.5 (3.7) | 10.6 (3.7) | -3.19 (-3.29, -3.10)                                          | 16.2 (4.5)        | 16.3 (4.6) | 15.7 (4.7) | 15.0 (5.1) | -0.42 (-0.57, -0.28)                                       | 16.3 (4.5)   | 15.9 (4.7) | 15.6 (4.8) | 15.4 (4.9) | -0.31 (-0.45, -0.17)                                       |
| Bread                  | 1.7 (2.6)      | 1.8 (2.5)  | 1.7 (2.6)  | 1.9 (2.6)  | 0.04 (-0.04, 0.12)                                         | 0.1 (0.5)          | 0.5 (0.9)  | 1.4 (1.8)  | 5.1 (2.7)  | 1.57 (1.52, 1.63)                                             | 1.9 (2.7)         | 1.7 (2.6)  | 1.7 (2.5)  | 1.8 (2.6)  | -0.03 (-0.11, 0.05)                                        | 1.9 (2.7)    | 1.8 (2.6)  | 1.8 (2.6)  | 1.6 (2.5)  | -0.12 (-0.19, -0.04)                                       |
| Noodles                | 1.8 (1.9)      | 1.6 (1.8)  | 1.7 (1.8)  | 1.7 (1.8)  | -0.02 (-0.08, 0.03)                                        | 0.7 (0.9)          | 1.3 (1.2)  | 2.2 (1.8)  | 2.6 (2.3)  | 0.66 (0.62, 0.71)                                             | 1.3 (1.5)         | 1.5 (1.6)  | 1.8 (1.8)  | 2.3 (2.1)  | 0.32 (0.27, 0.37)                                          | 1.6 (1.7)    | 1.6 (1.7)  | 1.7 (1.8)  | 2.0 (1.9)  | 0.13 (0.08, 0.19)                                          |
| Soba-noodles           | 0.5 (0.9)      | 0.4 (0.8)  | 0.6 (1.1)  | 0.6 (0.9)  | 0.06 (0.03, 0.09)                                          | 0.2 (0.4)          | 0.4 (0.5)  | 0.6 (0.9)  | 0.9 (1.4)  | 0.23 (0.2, 0.26)                                              | 0.5 (0.9)         | 0.5 (0.7)  | 0.5 (0.9)  | 0.6 (1.1)  | 0.05 (0.02, 0.08)                                          | 0.3 (0.6)    | 0.4 (0.6)  | 0.5 (0.9)  | 0.8 (1.3)  | 0.16 (0.14, 0.19)                                          |

The weekly frequency of foods according to each quartile of each dietary pattern are expressed as mean values (standard deviation).

CI confidence interval.
