# Supplementary material for: Dietary Patterns and Their Associations with Intermediate Age-Related Macular Degeneration in a Japanese Population
Source: MDPI journal article supplement (doi:10.3390/jcm11061617), 2022-03-15
Supplement: s1 [file s1]

Supplemental Table S4. Basic characteristics according to quartile of dietary pattern scores.

|                                    | Vegetable rich |              |              |              |                                                 | Varied staple food |              |              |              |                                                 | Animal foods rich |              |              |              |                                                 | Seafood rich |              |              |              |                                                 |
|------------------------------------|----------------|--------------|--------------|--------------|-------------------------------------------------|--------------------|--------------|--------------|--------------|-------------------------------------------------|-------------------|--------------|--------------|--------------|-------------------------------------------------|--------------|--------------|--------------|--------------|-------------------------------------------------|
|                                    | Q1             | Q2           | Q3           | Q4           | β coefficient (95% CI) per 1 quartile increment | Q1                 | Q2           | Q3           | Q4           | β coefficient (95% CI) per 1 quartile increment | Q1                | Q2           | Q3           | Q4           | β coefficient (95% CI) per 1 quartile increment | Q1           | Q2           | Q3           | Q4           | β coefficient (95% CI) per 1 quartile increment |
| Number                             | 858            | 858          | 859          | 858          |                                                 | 858                | 858          | 859          | 858          |                                                 | 858               | 858          | 859          | 858          |                                                 | 858          | 858          | 859          | 858          |                                                 |
| Men, %                             | 72.7           | 46.9         | 36.0         | 26.3         |                                                 | 60.0               | 47.7         | 40.9         | 33.3         |                                                 | 28.1              | 46.6         | 50.5         | 56.6         |                                                 | 29.5         | 45.2         | 54.0         | 53.1         |                                                 |
| Age, yo                            | 60.0 (8.2)     | 61.3 (8.1)   | 62.7 (7.3)   | 64.3 (6.7)   | 1.46 (1.23, 1.69)                               | 63.0 (7.3)         | 62.3 (7.5)   | 61.6 (8.0)   | 61.4 (8.1)   | -0.55 (-0.78, -0.32)                            | 65.1 (6.1)        | 63.2 (6.6)   | 61.1 (8.0)   | 58.9 (8.7)   | -2.06 (-2.28, -1.83)                            | 59.9 (8.2)   | 61.3 (7.7)   | 62.7 (7.6)   | 64.4 (6.7)   | 1.50 (1.28, 1.73)                               |
| Body mass index, kg/m <sup>2</sup> | 23.4 (3.3)     | 23.3 (3.3)   | 23.3 (3.3)   | 23.2 (3.1)   | -0.08 (-0.18, 0.02)                             | 23.4 (3.3)         | 23.4 (3.3)   | 23.3 (3.2)   | 23.1 (3.1)   | -0.12 (-0.22, -0.02)                            | 23.2 (3.3)        | 23.4 (3.2)   | 23.2 (3.2)   | 23.4 (3.3)   | 0.03 (-0.07, 0.12)                              | 23.2 (3.3)   | 23.2 (3.3)   | 23.4 (3.3)   | 23.4 (3.2)   | 0.09 (0.00, 0.19)                               |
| Systolic BP, mmHg                  | 131.3 (19.3)   | 129.3 (19.2) | 130.3 (19.4) | 130.4 (19.6) | -0.15 (-0.73, 0.43)                             | 131.1 (18.8)       | 130.8 (19.2) | 130.3 (20.0) | 129.1 (19.6) | -0.65 (-1.23, -0.08)                            | 131.1 (19.8)      | 130.5 (19.3) | 129.6 (19.4) | 130.1 (19.1) | -0.35 (-0.93, 0.23)                             | 128.3 (19.1) | 129.7 (19.5) | 131.3 (19.8) | 132 (18.9)   | 1.26 (0.68, 1.83)                               |
| Diastolic BP, mmHg                 | 78.1 (11.5)    | 75.8 (11.5)  | 76.1 (11.8)  | 74.6 (11.1)  | -1.02 (-1.36, -0.68)                            | 76.8 (11.2)        | 76.2 (11.4)  | 76.5 (11.9)  | 75.1 (11.5)  | -0.50 (-0.85, -0.16)                            | 75.3 (11.2)       | 75.8 (11.5)  | 76.4 (11.2)  | 77.2 (12.1)  | 0.62 (0.28, 0.96)                               | 75.0 (11.4)  | 76.1 (11.6)  | 76.7 (11.9)  | 76.9 (11.1)  | 0.64 (0.30, 0.99)                               |
| Fasting plasma glucose, mg/dL      | 103.4 (19.6)   | 102.2 (18.3) | 101.5 (16.3) | 100.3 (13.6) | -1.00 (-1.51, -0.49)                            | 102.1 (16.5)       | 102.7 (19.6) | 101.5 (16.5) | 101.2 (15.8) | -0.39 (-0.90, 0.12)                             | 101.2 (15.5)      | 102.5 (17.3) | 101.9 (17.2) | 101.8 (18.5) | 0.14 (-0.37, 0.66)                              | 99.4 (15.7)  | 100.7 (16.1) | 103.4 (18.8) | 104 (17.3)   | 1.65 (1.14, 2.16)                               |
| HemoglobinA1c, %                   | 5.7 (0.6)      | 5.7 (0.6)    | 5.7 (0.6)    | 5.7 (0.5)    | 0.00 (-0.02, 0.02)                              | 5.7 (0.6)          | 5.7 (0.7)    | 5.7 (0.6)    | 5.7 (0.5)    | -0.01 (-0.03, 0.00)                             | 5.7 (0.5)         | 5.7 (0.6)    | 5.7 (0.6)    | 5.7 (0.6)    | -0.02 (-0.04, -0.01)                            | 5.7 (0.6)    | 5.7 (0.6)    | 5.7 (0.6)    | 5.7 (0.6)    | 0.03 (0.01, 0.05)                               |
| Total cholesterol, mg/dL           | 208.6 (34.3)   | 209.9 (33.5) | 210.8 (32.6) | 210.7 (33.5) | 0.71 (-0.29, 1.71)                              | 205 (33.9)         | 210.2 (33)   | 209.6 (32.3) | 215.3 (33.9) | 3.04 (2.04, 4.04)                               | 211.5 (33.3)      | 209.2 (33.8) | 210.4 (32.8) | 209 (34.0)   | -0.64 (-1.64, 0.36)                             | 212.2 (33.8) | 211.4 (32.6) | 209 (34.5)   | 207.5 (32.8) | -1.68 (-2.68, -0.68)                            |
| HDL cholesterol, mg/dL             | 65.5 (17.1)    | 68.0 (17.1)  | 68.6 (16.6)  | 70.2 (16.9)  | 1.46 (0.96, 1.97)                               | 66.9 (16.7)        | 68.5 (17.6)  | 67.5 (16.5)  | 69.5 (17.1)  | 0.67 (0.16, 1.18)                               | 69.5 (17.1)       | 67.2 (16.4)  | 68.1 (16.9)  | 67.5 (17.5)  | -0.51 (-1.02, 0.00)                             | 69.6 (16.3)  | 68.7 (17.7)  | 67.3 (17.1)  | 66.7 (16.8)  | -1.00 (-1.51, -0.50)                            |
| LDL cholesterol, mg/dL             | 117.6 (32.1)   | 120.2 (31.0) | 120.9 (29.9) | 120.6 (29.5) | 0.97 (0.05, 1.89)                               | 115.9 (30.2)       | 119.5 (30.1) | 119.3 (31.1) | 124.5 (30.7) | 2.55 (1.64, 3.46)                               | 121.0 (29.8)      | 119.4 (31.8) | 120.3 (30.6) | 118.6 (30.3) | -0.61 (-1.53, 0.30)                             | 121.8 (30.9) | 120.8 (29.4) | 118.9 (31.5) | 117.8 (30.7) | -1.42 (-2.33, -0.50)                            |
| Triglycerides, mg/dL               | 127.6 (101.2)  | 108.5 (65.2) | 106.6 (68.7) | 99.5 (54.8)  | -8.63 (-10.86, -6.39)                           | 110.7 (68.9)       | 110.9 (74.2) | 114 (94.8)   | 106.6 (58.2) | -0.91 (-3.16, 1.34)                             | 105.1 (62.1)      | 113.2 (86.1) | 109.5 (67.9) | 114.4 (82)   | 2.42 (0.17, 4.67)                               | 103.8 (62.2) | 109.8 (66.3) | 113.8 (74.5) | 114.9 (93.6) | 3.73 (1.48, 5.98)                               |
| Hypertension, %                    | 49.7           | 47.4         | 49.0         | 46.3         |                                                 | 47.7               | 48.8         | 49.9         | 45.9         |                                                 | 51.2              | 49.9         | 46.6         | 44.8         |                                                 | 42.7         | 46.2         | 50.3         | 53.3         |                                                 |
| Diabetes, %                        | 13.2           | 11.0         | 10.5         | 10.5         |                                                 | 10.5               | 12.1         | 12.1         | 10.4         |                                                 | 12.0              | 12.4         | 11.2         | 9.6          |                                                 | 7.8          | 9.2          | 13.5         | 14.6         |                                                 |
| Dyslipidemia, %                    | 52.4           | 51.3         | 53.7         | 52.9         |                                                 | 46.3               | 52.6         | 54.1         | 57.3         |                                                 | 60.0              | 53.5         | 49.4         | 47.4         |                                                 | 51.4         | 52.3         | 53.0         | 53.6         |                                                 |
| Obesity, %                         | 28.6           | 27.6         | 28.2         | 26.3         |                                                 | 27.2               | 30.4         | 27.5         | 25.6         |                                                 | 26.0              | 28.6         | 28.2         | 28.0         |                                                 | 25.3         | 28.6         | 29.1         | 27.7         |                                                 |
| History of CVD, %                  | 3.5            | 4.9          | 3.5          | 3.5          |                                                 | 3.1                | 3.8          | 4.5          | 3.8          |                                                 | 4.3               | 4.4          | 2.7          | 4.0          |                                                 | 2.7          | 3.3          | 4.0          | 5.5          |                                                 |
| Smoking status, %                  |                |              |              |              |                                                 |                    |              |              |              |                                                 |                   |              |              |              |                                                 |              |              |              |              |                                                 |
| Never                              | 35.1           | 55.7         | 64.6         | 74.4         |                                                 | 51.2               | 56.9         | 59.8         | 61.9         |                                                 | 74.0              | 58.7         | 52.0         | 45.0         |                                                 | 66.2         | 58.7         | 51.7         | 53.1         |                                                 |
| Past                               | 39.3           | 29.8         | 25.3         | 16.3         |                                                 | 30.0               | 27.7         | 26.8         | 26.2         |                                                 | 20.0              | 27.5         | 29.6         | 33.6         |                                                 | 21.4         | 26.5         | 31.8         | 31.0         |                                                 |
| Current                            | 25.6           | 14.5         | 10.1         | 9.3          |                                                 | 18.9               | 15.4         | 13.4         | 11.9         |                                                 | 5.9               | 13.8         | 18.4         | 21.4         |                                                 | 12.4         | 14.8         | 16.5         | 15.9         |                                                 |
| Current drinker, %                 | 62.5           | 49.5         | 43.7         | 35.9         |                                                 | 55.8               | 48.6         | 45.6         | 41.5         |                                                 | 33.0              | 46.4         | 54.0         | 58.2         |                                                 | 38.6         | 47.3         | 53.3         | 52.3         |                                                 |
| Alcohol consumption, g/day         | 23.3 (29.6)    | 15.9 (26.5)  | 12.9 (26.9)  | 8.5 (18.1)   | -4.74 (-5.50, -3.97)                            | 19.4 (26.7)        | 15.0 (25.3)  | 15.5 (30.1)  | 10.7 (21.2)  | -2.54 (-3.32, -1.76)                            | 7.7 (18.1)        | 14.5 (24.5)  | 17.6 (26.5)  | 20.9 (32.0)  | 4.3 (3.53, 5.07)                                | 10.5 (22.0)  | 14.0 (23.7)  | 17.9 (27.9)  | 18.2 (29.8)  | 2.69 (1.91, 3.46)                               |

The characteristics according to each quartile of each dietary pattern are expressed as mean values (standard deviation).

BP blood pressure, HDL high-density lipoprotein, LDL low-density lipoprotein, CI confidence interval.
