# Supplementary material for: Dietary Patterns and Their Associations with Intermediate Age-Related Macular Degeneration in a Japanese Population
Source: MDPI journal article supplement (doi:10.3390/jcm11061617), 2022-03-15
Supplement: s1 [file s1]

Supplement Table S3. Weekly frequency of staple foods consumption at each meal of a day according to each dietary pattern

|                     | Vegetable rich |           |           |           |                                                               | Varied staple food |           |           |           |                                                             | Animal foods rich |           |           |           |                                                             | Seafood rich |           |           |           |                                                             |
|---------------------|----------------|-----------|-----------|-----------|---------------------------------------------------------------|--------------------|-----------|-----------|-----------|-------------------------------------------------------------|-------------------|-----------|-----------|-----------|-------------------------------------------------------------|--------------|-----------|-----------|-----------|-------------------------------------------------------------|
|                     | Q1             | Q2        | Q3        | Q4        | $\beta$ coefficient<br>(95%CI) per 1<br>quartile<br>increment | Q1                 | Q2        | Q3        | Q4        | $\beta$ coefficient (95%<br>CI) per 1 quartile<br>increment | Q1                | Q2        | Q3        | Q4        | $\beta$ coefficient (95%<br>CI) per 1 quartile<br>increment | Q1           | Q2        | Q3        | Q4        | $\beta$ coefficient (95%<br>CI) per 1 quartile<br>increment |
| <b>Rice</b>         |                |           |           |           |                                                               |                    |           |           |           |                                                             |                   |           |           |           |                                                             |              |           |           |           |                                                             |
| At breakfast        | 4.9 (2.9)      | 5.4 (2.6) | 5.6 (2.5) | 5.6 (2.5) | 0.20 (0.12, 0.28)                                             | 6.9 (0.6)          | 6.6 (1.2) | 5.5 (2.4) | 2.5 (2.9) | -1.43 (-1.49, -1.36)                                        | 5.5 (2.6)         | 5.5 (2.6) | 5.5 (2.5) | 5.0 (2.8) | -0.15 (-0.23, -0.07)                                        | 5.3 (2.7)    | 5.3 (2.7) | 5.4 (2.6) | 5.6 (2.5) | 0.09 (0.01, 0.17)                                           |
| At lunch            | 4.7 (2.5)      | 4.7 (2.6) | 4.8 (2.5) | 4.7 (2.6) | -0.01 (-0.08, 0.07)                                           | 6.6 (1.0)          | 5.7 (1.8) | 3.8 (2.4) | 2.8 (2.6) | -1.32 (-1.38, -1.26)                                        | 4.6 (2.6)         | 4.9 (2.5) | 4.7 (2.5) | 4.6 (2.5) | -0.03 (-0.10, 0.05)                                         | 5.1 (2.3)    | 4.8 (2.5) | 4.7 (2.5) | 4.3 (2.7) | -0.28 (-0.35, -0.20)                                        |
| At dinner           | 5.4 (2.3)      | 5.7 (2.1) | 5.8 (1.9) | 5.9 (2)   | 0.16 (0.10, 0.23)                                             | 6.5 (1.3)          | 5.8 (1.9) | 5.2 (2.3) | 5.2 (2.3) | -0.44 (-0.5, -0.38)                                         | 6.0 (1.9)         | 5.9 (1.9) | 5.5 (2.2) | 5.4 (2.3) | -0.24 (-0.31, -0.18)                                        | 5.9 (1.8)    | 5.8 (2.0) | 5.6 (2.2) | 5.5 (2.2) | -0.12 (-0.19, -0.06)                                        |
| <b>Bread</b>        |                |           |           |           |                                                               |                    |           |           |           |                                                             |                   |           |           |           |                                                             |              |           |           |           |                                                             |
| At breakfast        | 1.2 (2.3)      | 1.1 (2.2) | 1.1 (2.2) | 1.2 (2.2) | -0.03 (-0.10, 0.03)                                           | 0.1 (0.3)          | 0.2 (0.5) | 0.7 (1.4) | 3.7 (3.0) | 1.13 (1.07, 1.19)                                           | 1.2 (2.3)         | 1.1 (2.2) | 1.1 (2.1) | 1.3 (2.3) | 0.03 (-0.04, 0.10)                                          | 1.3 (2.4)    | 1.2 (2.3) | 1.2 (2.2) | 0.9 (2.0) | -0.14 (-0.20, -0.07)                                        |
| At lunch            | 0.4 (1.2)      | 0.6 (1.3) | 0.6 (1.3) | 0.7 (1.4) | 0.07 (0.03, 0.11)                                             | 0.1 (0.3)          | 0.2 (0.6) | 0.7 (1.3) | 1.3 (2.0) | 0.41 (0.38, 0.45)                                           | 0.8 (1.6)         | 0.5 (1.2) | 0.5 (1.3) | 0.5 (1.1) | -0.08 (-0.12, -0.04)                                        | 0.5 (1.2)    | 0.6 (1.5) | 0.6 (1.3) | 0.6 (1.3) | 0.02 (-0.02, 0.05)                                          |
| At dinner           | 0.1 (0.4)      | 0.1 (0.3) | 0.1 (0.3) | 0.1 (0.3) | 0.00 (-0.01, 0.01)                                            | 0 (0.1)            | 0 (0.3)   | 0.1 (0.3) | 0.1 (0.5) | 0.03 (0.02, 0.04)                                           | 0 (0.3)           | 0.1 (0.4) | 0 (0.2)   | 0.1 (0.5) | 0.02 (0.01, 0.03)                                           | 0.1 (0.3)    | 0 (0.3)   | 0.1 (0.4) | 0.1 (0.4) | 0 (-0.01, 0.02)                                             |
| <b>Noodles</b>      |                |           |           |           |                                                               |                    |           |           |           |                                                             |                   |           |           |           |                                                             |              |           |           |           |                                                             |
| At breakfast        | 0.1 (0.5)      | 0.1 (0.5) | 0.1 (0.4) | 0.1 (0.3) | -0.01 (-0.02, 0.00)                                           | 0 (0.2)            | 0.1 (0.3) | 0.1 (0.5) | 0.1 (0.6) | 0.03 (0.02, 0.04)                                           | 0.1 (0.2)         | 0.1 (0.3) | 0.1 (0.4) | 0.1 (0.6) | 0.03 (0.02, 0.04)                                           | 0.1 (0.4)    | 0.1 (0.4) | 0.1 (0.4) | 0.1 (0.4) | 0.01 (0, 0.02)                                              |
| At lunch            | 1.1 (1.5)      | 1.1 (1.5) | 1.1 (1.5) | 1.1 (1.5) | 0.00 (-0.05, 0.04)                                            | 0.4 (0.7)          | 0.7 (1)   | 1.5 (1.6) | 1.8 (1.9) | 0.53 (0.48, 0.57)                                           | 0.9 (1.4)         | 1.0 (1.4) | 1.1 (1.5) | 1.4 (1.6) | 0.16 (0.12, 0.21)                                           | 1.0 (1.4)    | 1.0 (1.4) | 1.1 (1.5) | 1.4 (1.7) | 0.13 (0.08, 0.17)                                           |
| At dinner           | 0.5 (0.9)      | 0.4 (0.7) | 0.5 (0.8) | 0.5 (0.8) | -0.01 (-0.03, 0.02)                                           | 0.3 (0.5)          | 0.5 (0.6) | 0.5 (0.8) | 0.7 (1.1) | 0.11 (0.09, 0.13)                                           | 0.3 (0.6)         | 0.4 (0.7) | 0.5 (0.8) | 0.7 (1.0) | 0.13 (0.11, 0.15)                                           | 0.5 (0.8)    | 0.5 (0.7) | 0.5 (0.8) | 0.5 (0.9) | 0.00 (-0.02, 0.02)                                          |
| <b>Soba-noodles</b> |                |           |           |           |                                                               |                    |           |           |           |                                                             |                   |           |           |           |                                                             |              |           |           |           |                                                             |
| At breakfast        | 0 (0.1)        | 0 (0.3)   | 0 (0.2)   | 0 (0.2)   | 0.00 (0, 0.01)                                                | 0 (0.1)            | 0 (0.1)   | 0 (0.2)   | 0 (0.3)   | 0.01 (0, 0.02)                                              | 0 (0.1)           | 0 (0.1)   | 0 (0.3)   | 0 (0.2)   | 0.01 (0, 0.01)                                              | 0 (0.1)      | 0 (0.1)   | 0 (0.1)   | 0 (0.3)   | 0.01 (0, 0.02)                                              |
| At lunch            | 0.3 (0.6)      | 0.2 (0.6) | 0.3 (0.8) | 0.4 (0.7) | 0.04 (0.02, 0.06)                                             | 0.1 (0.3)          | 0.2 (0.4) | 0.4 (0.7) | 0.6 (1.0) | 0.16 (0.14, 0.18)                                           | 0.3 (0.7)         | 0.3 (0.6) | 0.3 (0.7) | 0.3 (0.7) | 0.01 (-0.01, 0.03)                                          | 0.2 (0.4)    | 0.2 (0.5) | 0.3 (0.7) | 0.5 (0.9) | 0.10 (0.08, 0.12)                                           |
| At dinner           | 0.2 (0.5)      | 0.1 (0.4) | 0.2 (0.5) | 0.2 (0.5) | 0.01 (0, 0.02)                                                | 0.1 (0.3)          | 0.2 (0.3) | 0.2 (0.4) | 0.3 (0.7) | 0.06 (0.04, 0.07)                                           | 0.1 (0.4)         | 0.2 (0.4) | 0.2 (0.4) | 0.3 (0.6) | 0.04 (0.02, 0.05)                                           | 0.1 (0.3)    | 0.1 (0.3) | 0.2 (0.4) | 0.3 (0.7) | 0.05 (0.04, 0.06)                                           |

The weekly frequency of staple foods according to each quartile of each dietary pattern are expressed as mean values (standard deviation).
