# Supplementary material for: Dietary Patterns and Their Associations with Intermediate Age-Related Macular Degeneration in a Japanese Population
Source: MDPI journal article supplement (doi:10.3390/jcm11061617), 2022-03-15
Supplement: s1 [file s1]

**Supplemental Table S1. Association of each dietary pattern with the prevalence of early AMD (Category 2).**

|                    | Non-case/ Case | Model 1             |                    | Model 2             |                    |
|--------------------|----------------|---------------------|--------------------|---------------------|--------------------|
| Dietary pattern    | n (%)          | Odds Ratio (95% CI) | <i>p</i> for trend | Odds Ratio (95% CI) | <i>p</i> for trend |
| Vegetable rich     |                |                     |                    |                     |                    |
| Q1                 | 782/44 (5.3)   | Reference           | 0.677              | Reference           | 0.720              |
| Q2                 | 751/68 (8.3)   | 1.47 (0.98 - 2.20)  |                    | 1.45 (0.97 - 2.16)  |                    |
| Q3                 | 740/70 (8.6)   | 1.44 (0.96 - 2.16)  |                    | 1.41 (0.94 - 2.12)  |                    |
| Q4                 | 745/62 (7.7)   | 1.17 (0.76 - 1.80)  |                    | 1.16 (0.75 - 1.78)  |                    |
| Varied staple food |                |                     |                    |                     |                    |
| Q1                 | 727/60 (7.6)   | Reference           | 0.583              | Reference           | 0.608              |
| Q2                 | 755/64 (7.8)   | 1.02 (0.71 - 1.48)  |                    | 1.02 (0.71 - 1.48)  |                    |
| Q3                 | 755/61 (7.5)   | 0.99 (0.68 - 1.44)  |                    | 0.98 (0.67 - 1.43)  |                    |
| Q4                 | 781/59 (7.0)   | 0.91 (0.62 - 1.33)  |                    | 0.91 (0.62 - 1.34)  |                    |
| Animal foods rich  |                |                     |                    |                     |                    |
| Q1                 | 739/75 (9.2)   | Reference           | 0.668              | Reference           | 0.711              |
| Q2                 | 738/58 (7.3)   | 0.86 (0.60 - 1.24)  |                    | 0.87 (0.61 - 1.26)  |                    |
| Q3                 | 766/56 (6.8)   | 0.87 (0.60 - 1.26)  |                    | 0.88 (0.60 - 1.27)  |                    |
| Q4                 | 775/55 (6.6)   | 0.93 (0.63 - 1.36)  |                    | 0.94 (0.64 - 1.38)  |                    |
| Seafood rich       |                |                     |                    |                     |                    |
| Q1                 | 777/59 (7.1)   | Reference           | 0.324              | Reference           | 0.333              |
| Q2                 | 756/51 (6.3)   | 0.88 (0.60 - 1.30)  |                    | 0.87 (0.59 - 1.29)  |                    |
| Q3                 | 758/63 (7.7)   | 1.04 (0.71 - 1.53)  |                    | 1.04 (0.71 - 1.53)  |                    |

Q4

727/71 (8.9)

1.15 (0.79 - 1.68)

1.15 (0.79 - 1.67)

---

Model 1, adjusted for age, sex. Model 2, adjusted for age, sex, smoking status, alcohol consumption, presence of hypertension, diabetes, and dyslipidemia, history of cardiovascular disease. AMD, age-related macular degeneration; sd, standard deviation; CI, confidence interval.
