# Supplementary material for: Dietary Patterns and Their Associations with Intermediate Age-Related Macular Degeneration in a Japanese Population
Source: MDPI journal article supplement (doi:10.3390/jcm11061617), 2022-03-15
Supplement: s1 [file s1]

**Supplemental Table S5. Association of each dietary pattern with the prevalence of intermediate AMD (aged  $\geq 50$  years).**

|                    | Non-case/Case   | Model 1             |                    | Model 2             |                    |
|--------------------|-----------------|---------------------|--------------------|---------------------|--------------------|
| Dietary pattern    | n (%)           | Odds Ratio (95% CI) | <i>p</i> for trend | Odds Ratio (95% CI) | <i>p</i> for trend |
| Vegetable rich     |                 |                     |                    |                     |                    |
| Q1                 | 698/ 88 (11.2)  | Reference           | 0.973              | Reference           | 0.988              |
| Q2                 | 679/ 107 (13.6) | 1.22 (0.89 - 1.66)  |                    | 1.21 (0.89 - 1.66)  |                    |
| Q3                 | 683/ 104 (13.2) | 1.11 (0.80 - 1.52)  |                    | 1.10 (0.80 - 1.52)  |                    |
| Q4                 | 681/ 105 (13.4) | 1.05 (0.75 - 1.45)  |                    | 1.06 (0.76 - 1.47)  |                    |
| Varied staple food |                 |                     |                    |                     |                    |
| Q1                 | 664/ 122 (15.5) | Reference           | 0.004              | Reference           | 0.004              |
| Q2                 | 681/ 105 (13.4) | 0.88 (0.66 - 1.18)  |                    | 0.88 (0.66 - 1.17)  |                    |
| Q3                 | 687/ 100 (12.7) | 0.84 (0.63 - 1.12)  |                    | 0.82 (0.61 - 1.10)  |                    |
| Q4                 | 709/ 77 (9.8)   | 0.63 (0.46 - 0.85)  |                    | 0.63 (0.46 - 0.86)  |                    |
| Animal foods rich  |                 |                     |                    |                     |                    |
| Q1                 | 687/ 99 (12.6)  | Reference           | 0.952              | Reference           | 0.496              |
| Q2                 | 675/ 111 (14.1) | 1.29 (0.96 - 1.74)  |                    | 1.29 (0.95 - 1.74)  |                    |
| Q3                 | 682/ 105 (13.3) | 1.30 (0.96 - 1.76)  |                    | 1.29 (0.95 - 1.75)  |                    |
| Q4                 | 697/ 89 (11.3)  | 1.12 (0.81 - 1.54)  |                    | 1.10 (0.79 - 1.51)  |                    |
| Seafood rich       |                 |                     |                    |                     |                    |
| Q1                 | 704/ 82 (10.4)  | Reference           | 0.746              | Reference           | 0.649              |
| Q2                 | 683/ 103 (13.1) | 1.20 (0.88 - 1.64)  |                    | 1.19 (0.87 - 1.63)  |                    |
| Q3                 | 682/ 105 (13.3) | 1.10 (0.8 - 1.51)   |                    | 1.09 (0.79 - 1.49)  |                    |

Q4

672/ 114 (14.5)

1.12 (0.82 - 1.54)

1.10 (0.80 - 1.51)

---

Model 1, adjusted for age, sex. Model 2, adjusted for age, sex, smoking status, alcohol consumption, presence of hypertension, diabetes, and dyslipidemia, history of cardiovascular disease. AMD, age-related macular degeneration; CI, confidence interval.
